# Supplementary material
Source: MDPI journal article supplement (https://www.mdpi.com/2073-4441/16/6/814)
Supplement: s1 [file s1]

Archive with 2 entries (2 files):
- Annex 1---LIST OF ACRONYMS.pdf
- ANNEX 2---Supplemantary materials - Information on bibliography.pdf
