# Supplementary material
Source: MDPI journal article supplement (https://www.mdpi.com/2073-4441/16/6/814)
Supplement: s1 [file s1]

## Supplementary materials - Information on bibliography

Previous research works describing the Clean Up solution technology:

| Journal                                                                       | Year | Link                                                                                                                                    |
|-------------------------------------------------------------------------------|------|-----------------------------------------------------------------------------------------------------------------------------------------|
| Science of the Total Environment                                              | 2019 | <a href="https://doi.org/10.1016/j.scitotenv.2019.133620">https://doi.org/10.1016/j.scitotenv.2019.133620</a>                           |
| Environmental Technology & Innovation                                         | 2019 | <a href="https://doi.org/10.1016/j.eti.2019.100454">https://doi.org/10.1016/j.eti.2019.100454</a>                                       |
| Biomolecules                                                                  | 2019 | <a href="http://doi.org/10.3390/biom9100571">http://doi.org/10.3390/biom9100571</a>                                                     |
| Materials                                                                     | 2019 | <a href="http://doi.org/10.3390/ma12233810">http://doi.org/10.3390/ma12233810</a>                                                       |
| Environmental Technology & Innovation                                         | 2020 | <a href="https://doi.org/10.1016/j.eti.2020.100812">https://doi.org/10.1016/j.eti.2020.100812</a>                                       |
| Colloids and Surfaces A                                                       | 2020 | <a href="https://doi.org/10.1016/j.colsurfa.2020.125060">https://doi.org/10.1016/j.colsurfa.2020.125060</a>                             |
| Journal of Environmental Science and Health, Part A                           | 2020 | <a href="https://doi.org/10.1080/10934529.2020.1853985">https://doi.org/10.1080/10934529.2020.1853985</a>                               |
| Journal of Hazardous Materials                                                | 2021 | <a href="https://doi.org/10.1016/j.jhazmat.2020.123504">https://doi.org/10.1016/j.jhazmat.2020.123504</a>                               |
| Chemical Engineering Journal                                                  | 2021 | <a href="https://doi.org/10.1016/j.cej.2021.128514">https://doi.org/10.1016/j.cej.2021.128514</a>                                       |
| Chemosphere                                                                   | 2021 | <a href="https://doi.org/10.1016/j.chemosphere.2021.131238">https://doi.org/10.1016/j.chemosphere.2021.131238</a>                       |
| Springer Link - International Journal of Environmental Science and Technology | 2022 | <a href="https://link.springer.com/article/10.1007/s13762-021-03895-x">https://link.springer.com/article/10.1007/s13762-021-03895-x</a> |
| Process                                                                       | 2022 | <a href="https://www.mdpi.com/2227-9717/10/9/1703">https://www.mdpi.com/2227-9717/10/9/1703</a>                                         |

References in Spanish language related to technologies in WWTPs:

| Reference in Spanish                                                                                                                                                                                                                                                                                                                                         | Relationship to the scope of work                                                                                                                                                                                            |
|--------------------------------------------------------------------------------------------------------------------------------------------------------------------------------------------------------------------------------------------------------------------------------------------------------------------------------------------------------------|------------------------------------------------------------------------------------------------------------------------------------------------------------------------------------------------------------------------------|
| Iglesias Esteban, R. <i>La reutilización de efluentes depurados en España. Retrospectiva, desarrollo del Marco Normativo, estudio de las etcnologías de regeneración frente a los biorreactores de membrana y sus costes en función del uso</i> . Escuela Técnica Superior de Ingenieros Agrónomos (Universidad Politécnica de Madrid): Madrid, España 2016. | Exploration and utilization of Membrane Bioreactors (MBRs) as an alternative water purification method, substituting the secondary clarifier with ultrafiltration or microfiltration membranes in activated sludge processes |
| IDAE. <i>Estudio de Prospectiva. Consumo Energético en el Sector del Agua</i> . Instituto para la Diversificación y Ahorro de la Energía: Madrid, Spain, 2010.                                                                                                                                                                                               | Analysis of current energy consumption within Spain's water sector, with a specific focus on desalination and urban wastewater treatment technologies                                                                        |
| Sala, L. Balances energéticos del ciclo del agua y experiencias de reutilización planificada en municipios de la Costa Brava. In Seminario Internacional Agua, Energía y Cambio Climático, Valencia, Spain, 2007.                                                                                                                                            | Energy consumption study in the Costa Brava region, coupled with an analysis of reclaimed water usage data                                                                                                                   |
| Rougé, P. Evaluación técnica y económica de las tecnologías de regeneración de aguas. In Technical Workshop: The integration of reclaimed water in water resource management, Lloret de Mar, Gerona, 2005.                                                                                                                                                   | Evaluation, technical, and economic assessment with criteria for the design of a tertiary treatment plant                                                                                                                    |

|                                                                                                                                                                                                                                   |                                                                                                                                                                                                   |
|-----------------------------------------------------------------------------------------------------------------------------------------------------------------------------------------------------------------------------------|---------------------------------------------------------------------------------------------------------------------------------------------------------------------------------------------------|
| Ministerio de Medio Ambiente y Medio Rural y Marino. Gobierno de España. <i>Guía para la aplicación del R.D. 1620/2007, por el que se establece el Régimen Jurídico de la Rutilización de las Aguas Depuradas</i> . Madrid, 2010. | Implementation of Royal Decree 1620/2007 and usage standards in the field of reclaimed water reuse.                                                                                               |
| Mas, J. <i>Análisis coste/beneficio aplicado a los procesos de depuración y reutilización</i> . Master Universitario en Gestión Sostenible y Tecnologías del Agua (Universidad de Alicante): Alicante, Spain, 2016.               | Study of costs, quality, and uses of water purification and reuse in the treatment and regeneration stations of Benidorm and Rincón de León using ultrafiltration and reverse osmosis techniques. |
| Villar-García, A. Reutilización de aguas regeneradas. Aproximación a los costes de producción y valoración de su uso. <i>Water and Landscape</i> . 2016, 8, pp. 70-79. Doi: 10.17561/at.v0i8.3297                                 | Production costs of reclaimed water and associated services. Study of the economic value of productive activities supported by these resources.                                                   |
| TRAGUA. <i>Tecnologías de tratamiento de aguas para su regeneración</i> . Programa Consolider Tragua: Madrid, Spain, 2014.                                                                                                        | Study of different water treatment technologies for subsequent reuse.                                                                                                                             |
