# Supplementary material
Source: MDPI journal article supplement (https://www.mdpi.com/2073-4441/16/6/814)
Supplement: s1 [file s1 › Annex 1---LIST OF ACRONYMS.pdf]

## LIST OF ACRONYMS

|       |                                   |                |                                 |
|-------|-----------------------------------|----------------|---------------------------------|
| AC    | Activated carbon                  | O <sub>3</sub> | Ozone                           |
| AOP   | Advanced oxidation process        | OH·            | Hydroxyl radical                |
| BDE   | 1,4 - butanediol diglycidyl ether | PAC            | Powdered activated carbon       |
| BOD   | Biological oxygen demand          | PCPs           | Personal care products          |
| CD    | Cyclodextrin                      | PH             | Photocatalysis                  |
| CECs  | Contaminant of emerging concern   | PhACs          | Pharmacological compounds       |
| DABCO | 1,4-Diazabicyclo [2.2.2] octane   | PL             | Pulsed light                    |
| DOC   | Dissolved organic compounds       | PV             | Photovoltaic                    |
| EC    | Emerging contaminant              | PVGIS          | Photovoltaic Information System |
| EDCs  | Endocrine disruptors              | RO             | Reverse osmosis                 |
| EPs   | Emerging pollutants               | TSS            | Total suspended solids          |
| EQS   | Environmental quality standards   | UF             | Ultrafiltration                 |
| GAC   | Granular activated carbon         | UV             | Ultra violet                    |
| LCOE  | Levelized cost of electricity     | VAT            | Value added tax                 |
| MF    | Microfiltration                   | WWTP           | Wastewater treatment plant      |
| NF    | Nanofiltration                    | β-CD           | beta-Cyclodextrin               |
